# Supplementary material
Source: PubMed Central journal article supplement (PMC3795929)

Supplemental Fig 1

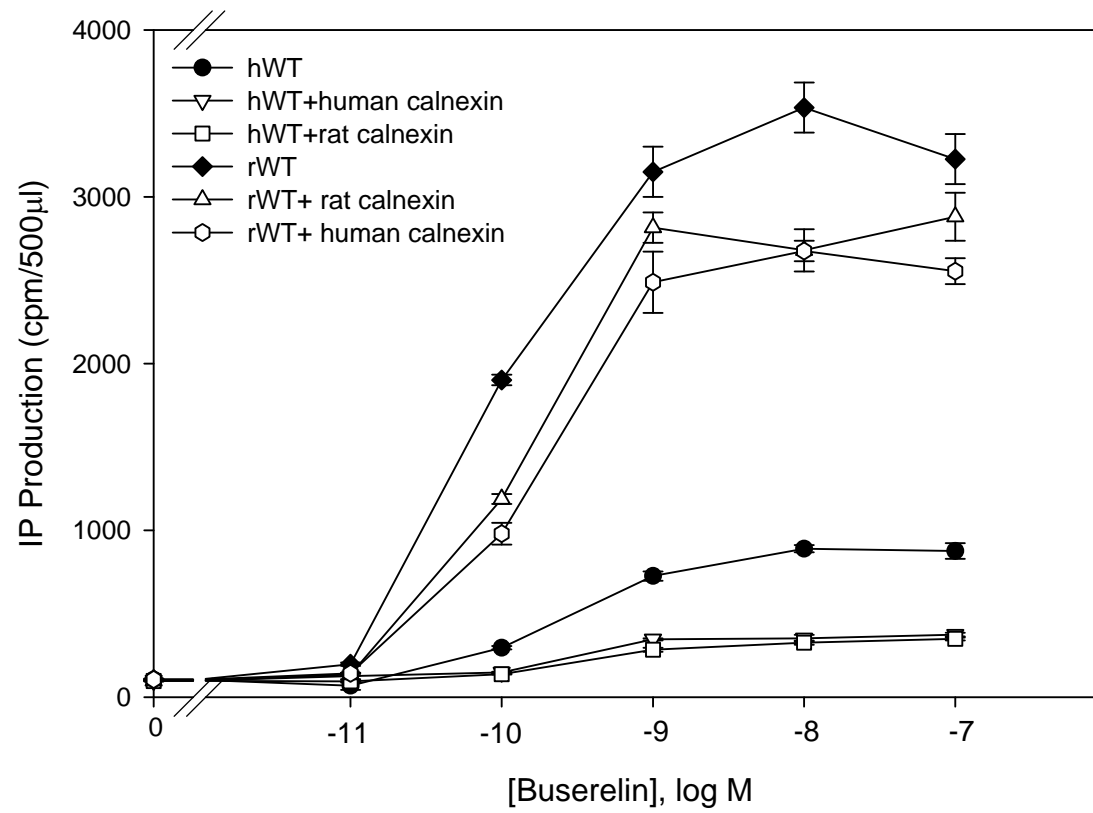

Supplement: NIHMS509228-supplement-01.pdf [file NIHMS509228-supplement-01.pdf]
